# Supplementary material for: Contrasting characteristics of open- and closed- cellularstratocumulus cloud in the Eastern North Atlantic
Source: Copernicus journal article supplement (doi:10.5194/acp-2021-63), 2021-02-18
Supplement: Supplementary file [file acp-2021-63-AC1-supplement.pdf]

1 We thank the reviewers for their thoughtful and constructive feedback on our submitted  
2 manuscript, "Contrasting characteristics of open- and closed-cellular stratocumulus cloud in the  
3 Eastern North Atlantic." We have made some substantive changes to the manuscript to address  
4 this feedback, most notably: (a) we have significantly expanded the literature review regarding  
5 the mechanisms responsible for the transitions between organizational cloud states, (b) we  
6 have quantified differences in additional variables between the open- and closed-cellular cases  
7 including the advection and surface fluxes and (c) we have scaled the height coordinate of our  
8 radiosonde plots by the observed boundary layer depth and (d) we have re-evaluated the  
9 estimates of liquid water path and precipitable water vapor from the microwave radiometer,  
10 and have removed measurements that are impacted by instrument wetting during precipitation  
11 events. The changes have significantly improved the manuscript, particularly providing an  
12 improved context for our results within the existing literature. Below, please find a point-by-  
13 point response to each of the reviewer comments including a documentation of the changes  
14 made to the manuscript.

15

16 Anonymous Referee #1

17

18 **Specific comments**

19 ***Line 42-42, and 316-317: "Despite these important impacts, the atmospheric processes***  
20 ***responsible for the formation and maintenance of these organizational states remains poorly***  
21 ***understood." A host of literature exists on the processes that are involved in driving and***  
22 ***maintaining closed- and open-cell stratocumulus cloud decks, and the processes that convert***  
23 ***one into the other. Hence writing that "processes responsible for the formation and***  
24 ***maintenance of these organizational states remains poorly understood" is incorrect. Here are***  
25 ***a few references. Please add any other works based on a literature search and change the***  
26 ***text to reflect the existing understanding of the subject.***

27 We thank the reviewer for the comment and have taken the opportunity to significantly expand  
28 the literature review particularly with respect to the body of work on the observational and  
29 modeling study of the mechanisms responsible for the transition between cloud organizational  
30 states. We have included all the references that were suggested and more.

31 Additional references and discussion have been added throughout the manuscript, but  
32 particularly in the introduction. For example,

33 Lines 40-51: " These differing modes organize the internal diabatic forcings within the MBL,  
34 impacting the low-level cloud fraction, shortwave albedo and liquid water path driving the  
35 localized contribution to the radiative energy balance and water cycle (e.g., Rossow et al. 2002;  
36 Savic-Jovcic and Stevens 2008; Wood et al. 2008; Wood et al., 2016). The key processes  
37 responsible for these organizing states have been the subject of much research over the past  
38 several decades with the interaction among precipitation and boundary layer dynamics  
39 identified as a main driver (e.g. Bretherton et al. 2004; Comstock et al. 2005, 2007; Sharon et al.  
40 2006; Stevens et al. 2005; Savic-Jovcic and Stevens 2008; Wang and Feingold, 2009; Feingold et

41 al. 2010). Aerosols, through their influences on the formation and suppression of drizzle have  
42 also been found to have important implications on MBL cloud organization (e.g. van Zanten and  
43 Stevens, 2005; Petters et al., 2006; Sharon et al., 2006; Wood et al., 2008; Xue et al., 2008;  
44 Wang and Feingold, 2009; Bretherton et al., 2010; Wood et al., 2011). The interplay of these  
45 different mechanisms and their relative importance under different regimes remains and area  
46 of active research and a needed target for improved understanding and representation in large-  
47 scale atmospheric models (Wood et al., 2016; Jensen et al., 2016).”

48

49 Line 72-83: “The driving mechanisms for changes in the organization of MBL stratocumulus  
50 clouds have also been the target for a number of modelling focused studies over recent  
51 decades. Shao and Randall (1996) perform simulations incorporating increasing complexity of  
52 the model analysis for closed cellular MBL clouds. They found that cloud-top radiative cooling is  
53 a primary driver of the boundary layer dynamics and cloud organization. Feingold et al. (2010)  
54 combine satellite observations with numerical simulations to show the role of collisions  
55 between precipitation generated cold pools in driving the characteristics of open-cellular cloud  
56 organizations and their oscillation between different, weakly stable states. While many studies  
57 have noted the importance of drizzle in the transition between organizational cloud states,  
58 Yamaguchi and Feingold (2014), through idealized three-dimensional simulations, highlight the  
59 importance of the spatial distribution of the precipitation. Feingold et al. (2015) perform a  
60 series of idealized cloud-resolving model simulations to investigate the two-way transitions  
61 between open- and closed-cellular cloud populations. Their findings reiterate the importance of  
62 precipitation in the transition from the closed- to open-cellular states and emphasize that  
63 stabilization of the boundary layer due to this precipitation and increased longwave cooling acts  
64 as a barrier to cloud formation and recovery to the closed-cellular cloud state.”

65

66 Line 428-433: “A number of studies over recent decades have identified the importance of  
67 aerosols, drizzle and their impacts on boundary layer dynamics in determining the cellular  
68 organization of clouds within the MBL. However, the interplay of these different mechanisms  
69 and their relative importance under different regimes remains and area of active research and  
70 advances in our understanding are necessary for improved representation in large-scale  
71 atmospheric models (Wood et al., 2016; Jensen et al., 2016).”

72

73 **Line 54-56: " However, Wood et al. (2011) and Terai et al. (2013) found that drizzle rates are**  
74 **not significantly different between open and closed cells, concluding that drizzle, and its**  
75 **associated thermodynamic feedbacks, are not the only factor causing the transition between**  
76 **mesoscale organizations." There is more to be written on this subject - see, e.g., Yamaguchi et**  
77 **al., 2015, "On the relationship between open cellular convective cloud patterns and the**  
78 **spatial distribution of precipitation", and Feingold et al., 2015, "On the reversibility of**  
79 **transitions between closed and open cellular convection".**

80 In the added discussion of modeling studies of the transitions between cloud mesoscale  
81 organizations we have discussed the further importance of the additional importance of the  
82 spatial distribution of drizzle (Yamaguchi et al. 2015) and the associated  
83 convergence/divergence from precipitation driven cold pools (Feingold et al. 2015).

84 Lines 77-81: "While many studies have noted the importance of drizzle in the transition  
85 between organizational cloud states, Yamaguchi and Feingold (2014), through idealized three-  
86 dimensional simulations, highlight the importance of the spatial distribution of the  
87 precipitation. Feingold et al. (2015) perform a series of idealized cloud-resolving model  
88 simulations to investigate the two-way transitions between open- and closed-cellular cloud  
89 populations."

90 **Line 63-65:** "Hence, most of the open-cellular stratocumulus that are observed over the ENA  
91 are fundamentally different than those observed in the other parts of the subtropical oceans  
92 under quiescent large-scale forcing conditions" Cold air outbreaks do conceptually differ from  
93 the air masses in the eastern subtropical oceans with stratocumulus cloud decks, but do the  
94 open cells really differ in these two situations, and how? In other words, it will not do to just  
95 state that "open-cellular stratocumulus that are observed over the ENA are fundamentally  
96 different than those observed in the other parts of the subtropical oceans under quiescent  
97 large-scale forcing conditions" without supporting evidence, literature references, and  
98 specifics. Please provide these or remove this passage if it cannot be supported.

99 We agree with the reviewer that this statement is likely overstating the differences, is not  
100 supported by the analysis, and not definitively evident from the existing literature. We have  
101 elected to remove this sentence from the manuscript.

102 **Figure 8e:** A logarithmic y-axis might perhaps help visualize the data better(?)

103

104 Agreed. We have replaced the linear scale with a logarithmic scale. See new figure here.

105

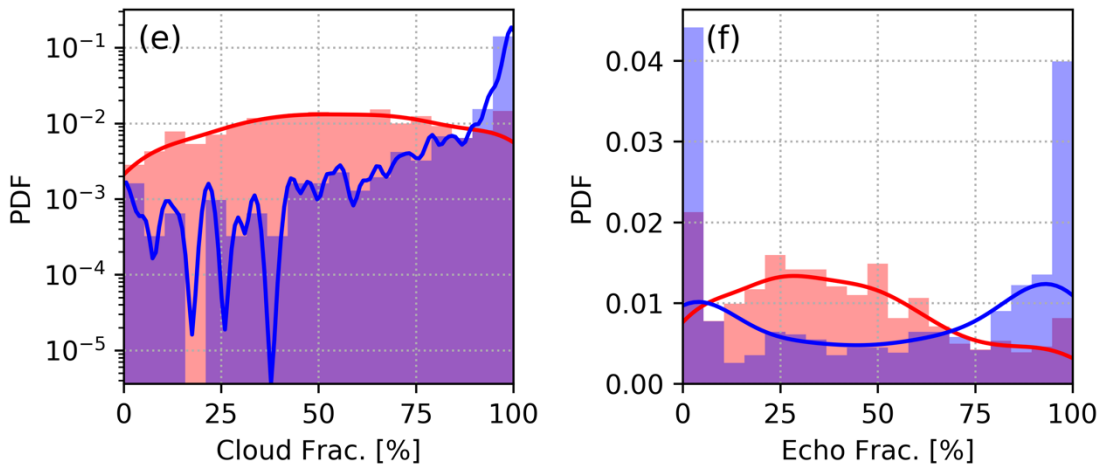

106

107

108 **Anonymous Referee #3**

109

110 **Major comments:**

111 **1. It is not straightforward from Figure 4 to conclude that "cold air advection is stronger for**  
112 **open-cellular cases". It seems the majority of trajectories in open-cell cases align with the SST**  
113 **contours, indicating a weak temperature gradient along the trajectory. Quantification is**  
114 **needed, which is absent in the analysis.**

115 We have calculated the mean and standard deviation of temperature and moisture advection  
116 for the pixel north of the ENA site for the open- and closed-cellular cases. We find that both  
117 open- and closed cellular organization populations show mean cold- and dry-air advection with  
118 the open-cellular cases showing stronger cold-air advection, and the closed-cellular cases  
119 showing stronger dry-air advection. We have included the mean values and standard deviations  
120 for each population in Table 3.

121 In the discussion of Figure 4, we have added the qualifier "relatively stronger cold air  
122 advection" regarding the open-cellular cases and provided a pointer to Table 3. We have also  
123 added the following bullet to the discussion of Table 3, "Both open- and closed-cellular  
124 populations show mean cold- and dry-air advection with the open-cellular cases showing  
125 stronger cold-air advection, and the closed-cellular cases showing stronger dry-air advection.  
126

127 **2. The analyses of the composite sounding have a couple of problems. First, the height**  
128 **should be scaled (e.g. by the main inversion height) to avoid artificial cancellation. Second,**  
129 **similarly, scaling may be needed for the temperature and humidity because samples are from**  
130 **different seasons (e.g. scaled by the seasonal mean). Given the limited number of cases, the**  
131 **composite absolute values of both variables may be biased toward a specific season with the**  
132 **largest samples.**

133 Care must always be taken in the creation and interpretation of composite visualizations. While  
134 scaling can help to highlight some features, it also can hide others. Taking the reviewers  
135 suggestions, we have scaled the sounding height by the inversion base height and used this for  
136 the vertical coordinate in Fig. 5 and Fig. 6. While this does change the shape of the profiles,  
137 particularly highlighting the sharpness of the inversion, it does not change the conclusions  
138 drawn from the previously presented plots. We have chosen to replace both Fig. 5 and Fig. 6  
139 with these scaled-height composites. Regarding further scaling of temperature and humidity  
140 due for soundings in different seasons, since the seasonal distribution of cases is very similar for  
141 the two populations (see Table 2), and we are not aiming to distinguish seasonal differences the  
142 scaling to temperature and moisture should not be necessary.

143 We have added the following text, describing the height normalization at lines 234-236, "For  
144 these composite profiles, the height coordinate is normalized by the height of the base of the  
145 subsidence inversion to avoid smoothing of the boundary layer thermodynamic structure  
146 (Augstein et al. 1974; Mahrt, 1976; Albrecht et al., 1995)."

147

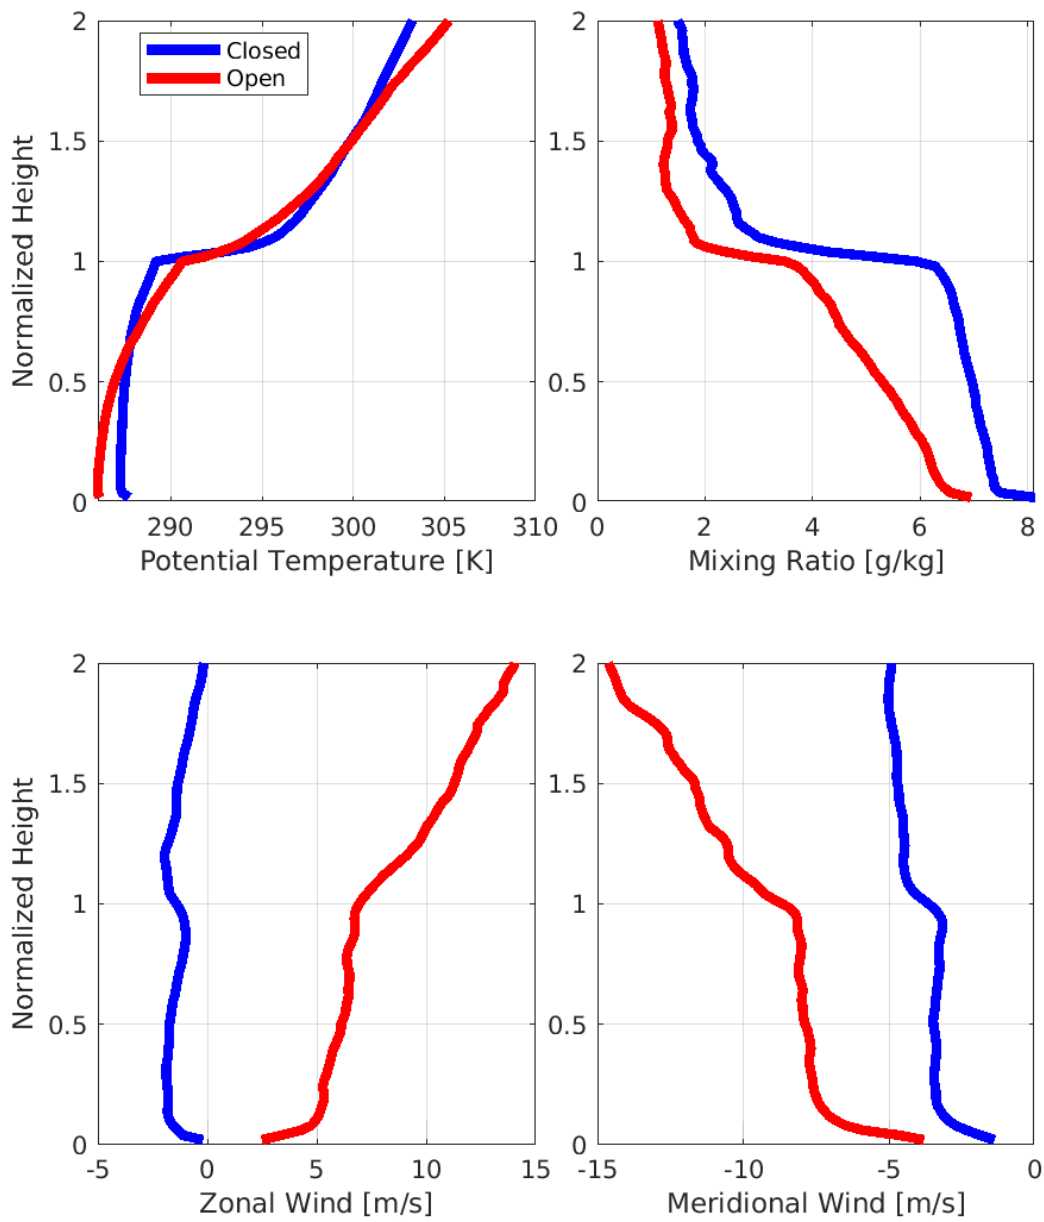

148

149 New Figure 5

150

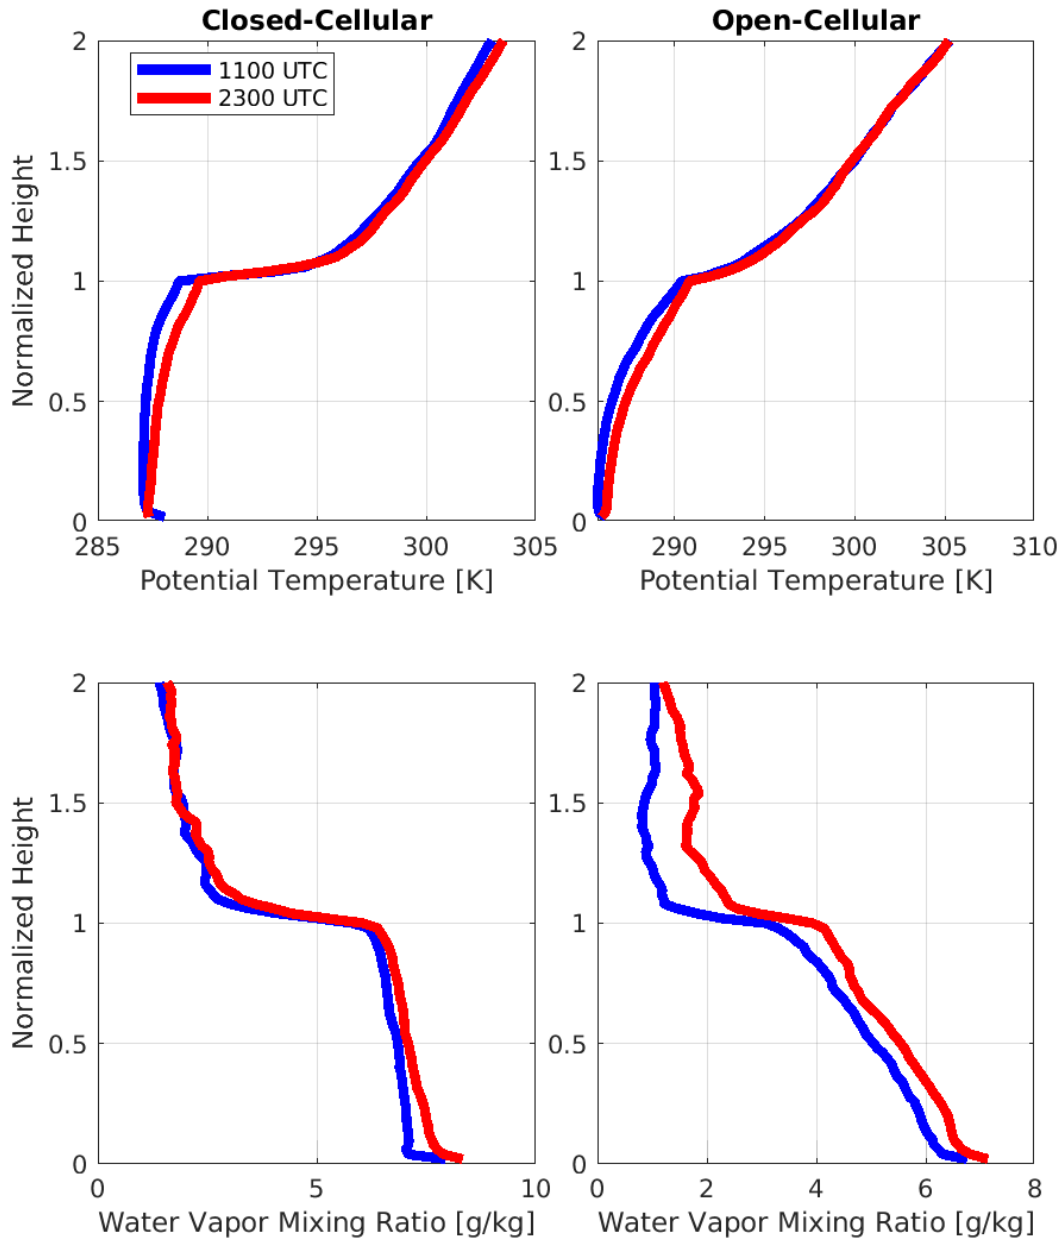

151

152 New Figure 6

153

154

155 **3. The discussion about the time evolution of the thermodynamic structure (Fig. 6) lacks**  
156 **physical insights. How do the diurnal cycle and advection influence evolution?**

157 The mean advective tendencies for both open- and closed-cellular organizations suggest cold-  
158 and dry-air advection which would manifest in cooling and drying of the boundary layer as a  
159 function of time. Figure 6 shows little to small increase in the temperature, and a moistening, of  
160 the boundary layer with time. This suggests that the local diurnal cycle plays a significant role in  
161 the evolution of the boundary layer thermodynamics, This is supported by the differences in  
162 the mean sensible and latent heat fluxes for the cloud organizations which show larger fluxes,  
163 and so larger increases in temperature and moisture for the open-cellular cases, consistent with  
164 the results shown in Figure 6.

165 We have added text at lines 252-258 to describe the relative contributions of large-scale  
166 advection and local surface fluxes to the evolution of boundary layer thermodynamics, "Given  
167 that the mean advective tendencies show cold- and dry-air advection for both cloud  
168 organization populations, we would expect advection to drive cooling and drying with time for  
169 each cloud organization population. Figure 6 shows small to little increase in the temperature  
170 and a moistening of the boundary layer with time for both open- and closed-cellular cases. This  
171 suggests that the local diurnal cycle plays the more significant role in the evolution of boundary  
172 layer thermodynamics. The difference in the mean sensible and latent heat fluxes between  
173 open- and closed-cellular cases is consistent with the changes in thermodynamic structure  
174 showing larger fluxes, and so larger increases in temperature and moisture for the open-cellular  
175 cases."

176 **4. Line 198. Could you discuss why closed-cell cases are more coupled? Is it due to large-scale**  
177 **factors such as temperature advection or the boundary-layer scale factor such as cloud-top**  
178 **radiative cooling or precipitation?**

179 Our expectation is that closed-cellular cases would occur under more coupled conditions due to  
180 shallower boundary layers, stronger cloud-top radiative cooling (e.g. Shao and Randall, 1996)  
181 and less precipitation.

182 We have added the following text at lines 240-242, "This is consistent with our expectations as  
183 the organization in closed-cellular cases are driven by relatively stronger cloud-top radiative  
184 cooling (e.g., Shao and Randall, 1996) and occur under shallow boundary layer depths with less  
185 precipitation."

186 **5. Lines 222-223. Again, why open-cellular cases are associated with stronger subsidence**  
187 **needs more discussion. From the perspective of PBL mass conservation:  $dz_i/dt = \text{ent} - w_{\text{sub}}$ ,**  
188 **in which  $z_i$  is the inversion height, ent it entrainment rate, and  $w_{\text{sub}}$  is subsidence rate.**  
189 **Larger subsidence leads to PBL shallowing whereas open-cellular cases have deeper PBL.**  
190 **Therefore, it must be the stronger entrainment that is responsible for the deeper PBL.**

191 In addition to the subsidence rate and entrainment of air from the free troposphere, the  
192 surface fluxes and wind-driven turbulence will also play an important role in the depth of the  
193 PBL. As has been noted in previous studies, and is quantified for our cases in table 3, the  
194 surface energy fluxes and horizontal winds are significantly stronger in the open cellular cases.  
195 The increased surface fluxes have been attributed to heating from greater downwelling  
196 radiative fluxes at the surface, a consequence of the lower cloud fractions for the open-cellular  
197 cases. Stronger boundary layer winds also result in greater production of mechanically-  
198 generated turbulence and a deeper boundary layer. We suspect that the stronger subsidence,  
199 for these cases that are generally occurring during cold-air outbreak conditions, is associated  
200 with post-frontal circulations.

201 We have added the following text at lines 276-280, “This greater subsidence rate is likely the  
202 result of post-frontal circulations during cold-air outbreak conditions. The deeper boundary  
203 layers for the open-cellular cases must be maintained by a combination of increased turbulence  
204 (Ghate et al., 2019, 2020) generated by the stronger wind speeds and surface sensible and  
205 latent heat fluxes which are significantly larger during closed-cell cases (Kazil et al., 2014; Wang  
206 et al., 2010), a consequence of the smaller cloud fractions and thus greater surface  
207 downwelling radiative fluxes.”

208

209 **6. Line 230. Still, why open-cellular cases have slightly higher PWV should be discussed. The**  
210 **key idea of Zhou and Bretherton's series of studies on cellular convection is that**  
211 **PWV *perturbation* is highly correlated with LWP perturbation. For case-averaged PWV, the**  
212 **story is completely different. The latter is a synoptic-scale problem whereas the former is a**  
213 **mesoscale problem.**

214 The reviewer is correct that the result from Zhou and Bretherton is not quite appropriate here,  
215 and we have thus removed this comparative statement. This comment also led us to scrutinize  
216 the LWP/PWV analysis a bit more closely where we found we have not properly accounted for  
217 precipitation influences on the microwave radiometer measurements. We have not removed  
218 measurements that are flagged as being influenced by precipitation, and in addition, removed  
219 PWV values that are more than two standard deviations away from the daily mean value. This  
220 results in removing a number of the larger PWV and LWP values in the dataset, particularly in  
221 the open-cellular cases where drizzle is prevalent. Removal of these suspect points changes: (1)  
222 the size of one of the peaks in the PWV histogram for open-cellular in Fig. 8, and removes some  
223 of the tail to larger values, (2) mutes the diurnal cycle in PWV and LWP shown in Fig. 9. and (3)  
224 changes the normalized values of LWP and PWV in Figure 11, but does not have any impact on  
225 the conclusions. We also find that the mean PWV (Table 3) is now slightly less for open-cellular  
226 cases compared to the closed-cellular cases.

227 The following changes have been made to the text:

228 Line 121-122, “MWR measurements that are flagged as being influenced by rain or PWV  
229 measurements that lie beyond 2 standard deviations of the daily mean are removed”



230 Line 294-295, “Also, the PWV is identical for the two organizations with slightly more variation  
231 for the open-cellular cases.”

232 Line 345 – 346. “The two cloud populations show very little difference in the PWV (Fig. 8b) with  
233 the closed-cellular cloud cases showing a more well-defined peak at the mode values,  
234 consistent with the similarity in the bulk properties presented in Table 3.”

235 **Minor comments:**

236 **Figure 1: the resolution is a little bit too low.**

237 We have included a much higher resolution version of this image.

238 **Figure 9: use local time or mark the period of day/night times.**

239

240 The time zone difference from UTC at the ENA site is no greater than 1 hour, so there is  
241 little difference between UTC and local time. However, to avoid any confusion, we have  
242 changed the time scale to local time.

243

244
